# Supplementary material for: The Quality Evaluation of Highland Barley and Its Suitability for Chinese Traditional Tsampa Processing
Source: MDPI journal article supplement (doi:10.3390/foods13040613), 2024-02-18
Supplement: s1 [file s1]

Table S1 Basic information of tested HB.

| Number | OS      | Notes | Number | OS      | Notes | Number | OS      | Notes |
|--------|---------|-------|--------|---------|-------|--------|---------|-------|
| CDU-14 | Sichuan | RA    | CDU-48 | Qinghai | CS    | SS-13  | Tibet   | VS    |
| CDU-15 | Tibet   | CS    | CDU-49 | Qinghai | CS    | SS-14  | -       | CS    |
| CDU-16 | Sichuan | VS    | CDU-50 | Qinghai | CS    | SS-15  | Tibet   | CS    |
| CDU-17 | Tibet   | VS    | CDU-51 | Qinghai | CS    | SS-16  | Tibet   | VS    |
| CDU-18 | Tibet   | CS    | CDU-52 | Qinghai | CS    | SS-17  | Qinghai | CS    |
| CDU-19 | Tibet   | CS    | CDU-53 | Qinghai | CS    | SS-18  | Gansu   | CS    |
| CDU-20 | Sichuan | VS    | CDU-54 | Qinghai | CS    | SS-19  | Qinghai | CS    |
| CDU-21 | Sichuan | CS    | CDU-55 | Qinghai | CS    | SS-20  | Tibet   | CS    |
| CDU-22 | Sichuan | CS    | CDU-56 | Tibet   | CS    | SS-21  | Tibet   | CS    |
| CDU-23 | Sichuan | RA    | CDU-57 | Tibet   | CS    | SS-22  | Tibet   | CS    |
| CDU-27 | Sichuan | RA    | CDU-58 | Tibet   | CS    | SS-23  | Tibet   | CS    |
| CDU-28 | Sichuan | RA    | CDU-59 | Tibet   | CS    | SS-24  | Tibet   | CS    |
| CDU-29 | Sichuan | RA    | CDU-60 | Tibet   | CS    | SS-25  | -       | VS    |
| CDU-33 | Qinghai | CS    | SS-01  | Tibet   | CS    | SS-26  | Shaanxi | VS    |
| CDU-34 | Sichuan | CS    | SS-02  | Qinghai | VS    | SS-27  | Tibet   | CS    |
| CDU-35 | Sichuan | CS    | SS-03  | Qinghai | CS    | SS-28  | Qinghai | CS    |
| CDU-36 | Qinghai | VS    | SS-04  | Tibet   | CS    | SS-29  | Tibet   | CS    |
| CDU-37 | Sichuan | VS    | SS-05  | Gansu   | CS    | SS-30  | Tibet   | VS    |
| CDU-38 | Sichuan | CS    | SS-06  | Qinghai | VS    | SS-31  | Tibet   | CS    |
| CDU-39 | Sichuan | RA    | SS-07  | Tibet   | CS    | SS-32  | -       | VS    |
| CDU-40 | Qinghai | CS    | SS-08  | Qinghai | CS    | SS-33  | -       | CS    |
| CDU-41 | Qinghai | CS    | SS-09  | Qinghai | CS    | SS-34  | Qinghai | CS    |
| CDU-42 | Qinghai | CS    | SS-10  | Tibet   | CS    | SS-35  | -       | CS    |
| CDU-43 | Qinghai | CS    | SS-11  | Tibet   | CS    | SS-36  | Tibet   | CS    |
| CDU-45 | Tibet   | CS    | SS-12  | Tibet   | CS    | SS-37  | Tibet   | CS    |
| CDU-47 | Qinghai | CS    |        |         |       |        |         |       |

- Represents unknown locality. OS represents origin source. RA represents rare amount, HB with RA

marked were not made into Tsampa for subsequent analysis. CS represents calibration set. VS represents verification set.

Table S2 Physicochemical traits of 76 varieties highland barley.

| Index                                   | No. | Range          | Median | Average | Std. deviation | CV (%) |
|-----------------------------------------|-----|----------------|--------|---------|----------------|--------|
| L*                                      | 76  | 35.10-85.56    | 59.61  | 60.14   | 14.80          | 24.61  |
| a*                                      | 76  | -0.71-10.49    | 3.28   | 2.93    | 1.95           | 66.55  |
| b*                                      | 76  | 13.54-46.78    | 29.39  | 28.52   | 7.14           | 25.04  |
| Moisture (%)                            | 76  | 9.07-14.70     | 10.47  | 10.77   | 1.18           | 10.96  |
| Fat (%)                                 | 76  | 0.99-7.50      | 2.12   | 2.35    | 1.04           | 44.26  |
| Total starch (%)                        | 76  | 39.45-61.84    | 50.55  | 51.30   | 4.98           | 9.71   |
| Amylose (%)                             | 76  | 3.03-20.98     | 15.73  | 15.81   | 3.15           | 19.92  |
| Amylopectin (%)                         | 76  | 24.76-48.98    | 35.80  | 35.49   | 4.83           | 13.61  |
| Protein (%)                             | 76  | 3.99-8.99      | 6.50   | 6.59    | 1.30           | 19.73  |
| $\beta$ -glucan (%)                     | 76  | 3.33-8.97      | 4.53   | 4.57    | 0.77           | 16.85  |
| Total dietary fiber (%)                 | 76  | 13.56-32.15    | 19.74  | 20.50   | 3.51           | 17.12  |
| Free phenolic (mg·100g <sup>-1</sup> )  | 76  | 28.19-385.58   | 208.60 | 196.543 | 92.83          | 47.23  |
| Bound phenolic (mg·100g <sup>-1</sup> ) | 76  | 34.07-232.08   | 148.28 | 139.51  | 57.06          | 40.90  |
| Total phenolic (mg·100g <sup>-1</sup> ) | 76  | 62.26-609.66   | 348.54 | 336.06  | 147.47         | 43.88  |
| Na (mg·100g <sup>-1</sup> )             | 76  | 2.86-108.05    | 25.06  | 29.00   | 19.57          | 67.48  |
| Mg (mg·100g <sup>-1</sup> )             | 76  | 35.89-270.25   | 112.17 | 118.89  | 44.76          | 37.65  |
| K (mg·100g <sup>-1</sup> )              | 76  | 293.14-1012.98 | 523.65 | 539     | 179.05         | 33.18  |
| Ca (mg·100g <sup>-1</sup> )             | 76  | 20.49-127.28   | 53.70  | 56.17   | 20.35          | 36.23  |
| Mn (mg·100g <sup>-1</sup> )             | 76  | 0.90-6.07      | 2.39   | 2.62    | 1.03           | 39.31  |
| Fe (mg·100g <sup>-1</sup> )             | 76  | 0.00-321.66    | 7.73   | 42.14   | 73.32          | 173.99 |
| Co (mg·100g <sup>-1</sup> )             | 76  | 0.00-0.5748    | 0.0049 | 0.0987  | 0.1587         | 160.74 |
| Cu (mg·100g <sup>-1</sup> )             | 76  | 0.00-4.90      | 0.75   | 0.92    | 0.75           | 81.52  |
| Zn (mg·100g <sup>-1</sup> )             | 76  | 1.37-5.19      | 3.26   | 3.36    | 0.99           | 29.46  |

|                             |    |             |        |        |        |        |
|-----------------------------|----|-------------|--------|--------|--------|--------|
| Se (mg·100g <sup>-1</sup> ) | 76 | 0.00-0.0544 | 0.0025 | 0.0048 | 0.0076 | 160.02 |
| Mo (mg·100g <sup>-1</sup> ) | 76 | 0.01-1.96   | 0.07   | 0.24   | 0.39   | 162.50 |

Table S3 Color classification of HB seeds.

| Group  | Quantity | Number                                                                                                                                                                              |
|--------|----------|-------------------------------------------------------------------------------------------------------------------------------------------------------------------------------------|
| Gary   | 30       | SS-01、SS-02、SS-03、SS-04、SS-05、SS-06、SS-07、SS-08、SS-09、SS-10、SS-11、SS-13、SS-15、SS-16、SS-18、SS-19、SS-20、SS-21、SS-22、SS-23、SS-25、SS-26、SS-27、SS-28、SS-30、SS-31、SS-34、SS-35、SS-36、SS-37 |
| Yellow | 19       | CDU-19、CDU-20、CDU-21、CDU-22、CDU-33、CDU-34、CDU-35、CDU-36、CDU-37、CDU-40、CDU-41、CDU-56、CDU-57、CDU-59、CDU-60、SS-14、SS-17、SS-32、SS-33                                                    |
| Brown  | 14       | CDU-14、CDU-15、CDU-16、CDU-17、CDU-18、CDU-23、CDU-27、CDU-28、CDU-29、CDU-39、CDU-42、CDU-43、CDU-51、SS-12                                                                                    |
| Black  | 12       | CDU-38、CDU-45、CDU-47、CDU-48、CDU-49、CDU-50、CDU-52、CDU-53、CDU-54、CDU-55、SS-24、SS-29                                                                                                   |
| Red    | 1        | CDU-58                                                                                                                                                                              |

Table S4 Colors and texture characteristics of Tsampa.

| Index                | No. | Range             | Median  | Average | Std. deviation | CV (%) |
|----------------------|-----|-------------------|---------|---------|----------------|--------|
| L*                   | 70  | 39.56 - 59.17     | 48.59   | 48.51   | 5.34           | 11.01  |
| a*                   | 70  | 2.21 - 7.32       | 4.75    | 4.65    | 1.30           | 27.96  |
| b*                   | 70  | 1.77 - 13.74      | 9.35    | 8.36    | 3.39           | 40.55  |
| Hardness (g)         | 70  | 2308.78 - 4440.89 | 3514.70 | 3471.67 | 470.77         | 13.56  |
| Adhesiveness (g·sec) | 70  | 0.67 - 26.49      | 11.21   | 11.77   | 6.54           | 55.56  |
| Springiness          | 70  | 0.0320 - 0.0735   | 0.0439  | 0.0440  | 0.0069         | 15.68  |
| Cohesiveness         | 70  | 0.0333 - 0.0790   | 0.0419  | 0.0427  | 0.0074         | 17.33  |
| Gumminess (g)        | 70  | 86.56 - 212.43    | 147.36  | 148.22  | 31.43          | 21.20  |
| Chewiness (g)        | 70  | 2.90 - 13.61      | 6.48    | 6.67    | 2.29           | 34.33  |
| Resilience           | 70  | 0.0110 - 0.0270   | 0.0140  | 0.0143  | 0.0024         | 16.78  |

Table S5 Color classification of Tsampa.

| Group | Quantity | Number                                                                                                                                    |
|-------|----------|-------------------------------------------------------------------------------------------------------------------------------------------|
| G     | 13       | SS-01、SS-03、SS-06、SS-07、SS-08、SS-16、SS-21、SS-25、SS-27、SS-30、SS-34、SS-36、SS-37                                                             |
| Y     | 22       | CDU-20、CDU-21、CDU-33、CDU-35、CDU-59、CDU-60、SS-02、SS-09、SS-10、SS-11、SS-13、SS-15、SS-17、SS-18、SS-19、SS-20、SS-22、SS-23、SS-26、SS-28、SS-33、SS-35 |
| LB    | 17       | CDU-15、CDU-16、CDU-19、CDU-22、CDU-34、CDU-37、CDU-40、CDU-41、CDU-42、CDU-56、CDU-57、CDU-58、SS-05、SS-12、SS-14、SS-31、SS-32                         |
| DB    | 18       | CDU-17、CDU-18、CDU-36、CDU-38、CDU-43、CDU-45、CDU-47、CDU-48、CDU-49、CDU-50、CDU-51、CDU-52、CDU-53、CDU-54、CDU-55、SS-04、SS-24、SS-29                |

Table S6 Correlation coefficient of quality indexes of Tsampa.

|              | Hardness            | Adhesiveness        | Springiness         | Cohesiveness        | Gumminess           | Chewiness           | Resilience          | L*                  | a*                  | b*                  |
|--------------|---------------------|---------------------|---------------------|---------------------|---------------------|---------------------|---------------------|---------------------|---------------------|---------------------|
| Hardness     | 1                   | -0.499 <sup>b</sup> | 0.216               | 0.086               | 0.738 <sup>b</sup>  | 0.506 <sup>b</sup>  | 0.114               | -0.360 <sup>b</sup> | -0.026              | -0.259 <sup>a</sup> |
| Adhesiveness | -0.499 <sup>b</sup> | 1                   | -0.594 <sup>b</sup> | -0.507 <sup>b</sup> | -0.714 <sup>b</sup> | -0.692 <sup>b</sup> | -0.501 <sup>b</sup> | 0.545 <sup>b</sup>  | 0.355 <sup>b</sup>  | 0.478 <sup>b</sup>  |
| Springiness  | 0.216               | -0.594 <sup>b</sup> | 1                   | 0.961 <sup>b</sup>  | 0.780 <sup>b</sup>  | 0.935 <sup>b</sup>  | 0.946 <sup>b</sup>  | -0.622 <sup>b</sup> | -0.284 <sup>a</sup> | -0.493 <sup>b</sup> |
| Cohesiveness | 0.086               | -0.507 <sup>b</sup> | 0.961 <sup>b</sup>  | 1                   | 0.715 <sup>b</sup>  | 0.887 <sup>b</sup>  | 0.980 <sup>b</sup>  | -0.502 <sup>b</sup> | -0.187              | -0.365 <sup>b</sup> |
| Gumminess    | 0.738 <sup>b</sup>  | -0.714 <sup>b</sup> | 0.780 <sup>b</sup>  | 0.715 <sup>b</sup>  | 1                   | 0.936 <sup>b</sup>  | 0.715 <sup>b</sup>  | -0.589 <sup>b</sup> | -0.162              | -0.435 <sup>b</sup> |
| Chewiness    | 0.506 <sup>b</sup>  | -0.692 <sup>b</sup> | 0.935 <sup>b</sup>  | 0.887 <sup>b</sup>  | 0.936 <sup>b</sup>  | 1                   | 0.880 <sup>b</sup>  | -0.618 <sup>b</sup> | -0.231              | -0.469 <sup>b</sup> |
| Resilience   | 0.114               | -0.501 <sup>b</sup> | 0.946 <sup>b</sup>  | 0.980 <sup>b</sup>  | 0.715 <sup>b</sup>  | 0.880 <sup>b</sup>  | 1                   | -0.502 <sup>b</sup> | -0.188              | -0.370 <sup>b</sup> |
| L*           | -0.360 <sup>b</sup> | 0.545 <sup>b</sup>  | -0.622 <sup>b</sup> | -0.502 <sup>b</sup> | -0.589 <sup>b</sup> | -0.618 <sup>b</sup> | -0.502 <sup>b</sup> | 1                   | 0.610 <sup>b</sup>  | 0.912 <sup>b</sup>  |
| a*           | -0.026              | 0.355 <sup>b</sup>  | -0.284 <sup>a</sup> | -0.187              | -0.162              | -0.231              | -0.188              | 0.610 <sup>b</sup>  | 1                   | 0.846 <sup>b</sup>  |
| b*           | -0.259 <sup>a</sup> | 0.478 <sup>b</sup>  | -0.493 <sup>b</sup> | -0.365 <sup>b</sup> | -0.435 <sup>b</sup> | -0.469 <sup>b</sup> | -0.370 <sup>b</sup> | 0.912 <sup>b</sup>  | 0.846 <sup>b</sup>  | 1                   |

<sup>a</sup> Represent the significance levels at  $p < 0.05$ .

<sup>b</sup> Represent the significance levels at  $p < 0.01$ .



Table 7 Differences in color and texture characteristics of three grades of Tsampa.

| Index                | Grade I                       | Grade II                      | Grade III                    |
|----------------------|-------------------------------|-------------------------------|------------------------------|
| L*                   | 43.62 ± 2.97 <sup>c</sup>     | 48.11 ± 4.00 <sup>b</sup>     | 53.19 ± 3.83 <sup>a</sup>    |
| a*                   | 3.79 ± 1.14 <sup>b</sup>      | 4.91 ± 1.42 <sup>a</sup>      | 5.17 ± 0.93 <sup>a</sup>     |
| b*                   | 5.53 ± 2.57 <sup>c</sup>      | 8.34 ± 3.05 <sup>b</sup>      | 10.86 ± 2.21 <sup>a</sup>    |
| Hardness (g)         | 3746.56 ± 516.14 <sup>a</sup> | 3533.25 ± 347.17 <sup>b</sup> | 3173.1 ± 357.52 <sup>c</sup> |
| Adhesiveness (g·sec) | 5.78 ± 3.16 <sup>c</sup>      | 10.52 ± 4.29 <sup>b</sup>     | 18.2 ± 4.48 <sup>a</sup>     |
| Springiness          | 0.05 ± 0.01 <sup>a</sup>      | 0.04 ± 0.00 <sup>b</sup>      | 0.04 ± 0.00 <sup>c</sup>     |
| Cohesiveness         | 0.05 ± 0.01 <sup>a</sup>      | 0.04 ± 0.00 <sup>b</sup>      | 0.04 ± 0.00 <sup>c</sup>     |
| Gumminess (g)        | 180.94 ± 17.72 <sup>a</sup>   | 151.38 ± 15.03 <sup>b</sup>   | 116.51 ± 17.89 <sup>c</sup>  |
| Chewiness (g)        | 9.21 ± 1.67 <sup>a</sup>      | 6.67 ± 0.76 <sup>b</sup>      | 4.42 ± 0.96 <sup>c</sup>     |
| Resilience           | 0.02 ± 0.00 <sup>a</sup>      | 0.01 ± 0.00 <sup>b</sup>      | 0.01 ± 0.00 <sup>c</sup>     |

Table S8 Partial regression coefficients of key indicators.

| Parameter       | Partial<br>regression<br>coefficient | Std   | Standard<br>regression<br>coefficient | t value | p value | Tolerance | VIF   |
|-----------------|--------------------------------------|-------|---------------------------------------|---------|---------|-----------|-------|
| constant        | -4.047                               | 2.941 |                                       | -1.376  | 0.175   |           |       |
| Moisture        | 0.307                                | 0.148 | 0.181                                 | 2.072   | 0.043   | 0.720     | 1.389 |
| Amylose         | -0.170                               | 0.066 | -0.311                                | -2.581  | 0.013   | 0.447     | 2.235 |
| Protein         | 0.391                                | 0.148 | 0.305                                 | 2.639   | 0.011   | 0.488     | 2.050 |
| $\beta$ -Glucan | 0.562                                | 0.209 | 0.266                                 | 2.685   | 0.010   | 0.664     | 1.507 |
| a*              | 0.322                                | 0.091 | 0.377                                 | 3.519   | 0.001   | 0.568     | 1.760 |
| b*              | -0.089                               | 0.019 | -0.406                                | -4.598  | 0.000   | 0.835     | 1.198 |

Table S9 Analysis on the prediction results of Tsampa in validation set.

|          | Actual value (Y) | Actual grade | Prediction value (F) | Prediction grade | Contrast     |
|----------|------------------|--------------|----------------------|------------------|--------------|
| V1       | 1.272            | I            | 0.764                | II               | Inconsistent |
| V2       | 1.283            | I            | 2.015                | I                | Consistent   |
| V3       | 0.673            | II           | -0.556               | II               | Consistent   |
| V4       | 0.614            | II           | -0.221               | II               | Consistent   |
| V5       | 2.232            | I            | 3.256                | I                | Consistent   |
| V6       | 0.285            | II           | 0.308                | II               | Consistent   |
| V7       | -0.159           | II           | 0.475                | II               | Consistent   |
| V8       | -1.772           | III          | -2.011               | III              | Consistent   |
| V9       | -1.743           | III          | -2.450               | III              | Consistent   |
| V10      | -0.322           | II           | -0.997               | III              | Inconsistent |
| V11      | -0.882           | III          | -1.200               | III              | Consistent   |
| V12      | 1.890            | I            | 1.149                | I                | Consistent   |
| V13      | -1.166           | III          | -1.545               | III              | Consistent   |
| V14      | -0.460           | II           | 1.569                | I                | Inconsistent |
| Accuracy | 78.57%           |              |                      |                  |              |
